# Supplementary material
Source: MDPI journal article supplement (https://www.mdpi.com/2227-9040/11/5/305)
Supplement: s1 [file s1]

# Rhodamine Derivative-Linked Silica-Coated Upconverting Nanophosphor ( $\text{NaYF}_4: \text{Yb}^{3+}/\text{Er}^{3+}@\text{SiO}_2\text{-RBDA}$ ) for Ratiometric, Ultrasensitive Chemosensing of $\text{Pb}^{2+}$ Ions

Jitender Kumar <sup>1</sup> and Indrajit Roy <sup>1,\*</sup>

Department of Chemistry, University of Delhi, Delhi 110007, India; jitender.chemistry@gmail.com

\* Correspondence: indrajitroy11@gmail.com; Tel.: +91-9560721851

## 1. Materials and reagents

All chemicals have been used without further purification.  $\text{Y}(\text{NO}_3)_3 \cdot 6\text{H}_2\text{O}$  (99.99%),  $\text{Yb}(\text{NO}_3)_3 \cdot 6\text{H}_2\text{O}$  (99.99%),  $\text{Er}(\text{NO}_3)_3 \cdot 6\text{H}_2\text{O}$  (99.99%), terephthalaldehyde (reagent 99%), (3-aminopropyl)triethoxysilane (APTES 99%), acetic acid (glacial, reagent 99%), and ammonia solution (25%) were purchased from Sigma-Aldrich. Oleic acid (90%, technical grade), 1-octadecene (90%, technical grade), hydrazine hydrate (reagent, 80%), tetraethoxysilane (TEOS 98%), toluene (99.7%), and hydrochloric acid (HCl, analytical reagent 35–38 %) were purchased from Alfa Aesar. Rhodamine B (RhB, 95%) was purchased from Loba Chemie Pvt. Ltd. Ammonium fluoride ( $\text{NH}_4\text{F}$ , 99%), sodium hydroxide (NaOH, 97%), cetyltrimethylammonium bromide (CTAB 99%), cyclohexane ( $\text{C}_6\text{H}_{12}$  99%), ethanol ( $\text{C}_2\text{H}_5\text{OH}$ , analytical reagent 99%), and methanol ( $\text{CH}_3\text{OH}$ , analytical reagent 99%) were purchased from Spectrochem Pvt. Ltd. All of the aqueous solutions were prepared using double-distilled water. Aqueous solutions of  $\text{Cs}^+$ ,  $\text{Na}^+$ ,  $\text{K}^+$ ,  $\text{Fe}^{3+}$ ,  $\text{Ni}^{2+}$ ,  $\text{Cd}^{2+}$ ,  $\text{Mg}^{2+}$ ,  $\text{As}^{2+}$ ,  $\text{Ca}^{2+}$ ,  $\text{Cu}^{2+}$ ,  $\text{Mn}^{2+}$ ,  $\text{Co}^{2+}$ ,  $\text{Sn}^{2+}$ ,  $\text{Zn}^{2+}$ , and  $\text{Pb}^{2+}$  were prepared from their corresponding halide salts.

## 2. Equipment and Characterizations

The synthesized nanophosphors were characterized by field emission scanning electron microscopy (FESEM) using STEM, MERLIN Zeiss-Germany. For that, the suspension of nanophosphors was deposited on a copper TEM-grid coated with carbon film (Ted Pella, USA). To confirm the exact shape and size of the nanophosphors, transmission electron microscopy (TEM) using a TECNAI G2 -30 U TWIN (FEI, Eindhoven, Netherlands) instrument, operated with an accelerated voltage of 300 kV, was utilized. The average hydrodynamic diameter of the nanophosphors was measured by dynamic light scattering (DLS), using a NANO-ZS series MALVERN ZETASIZER instrument. Powder x-ray diffraction measurement was done to analyze the phase composition and crystalline nature of nanophosphors, using a Bruker D8 Discover X-ray spectrometer, which utilizes  $\text{Cu-K}\alpha$  radiation ( $\lambda = 1.54060 \text{ \AA}$ ) over the  $2\theta$  range of 10–80 degrees at the scanning rate of 2.58 degrees/min. FTIR spectra were taken from the range of 4000 to 400  $\text{cm}^{-1}$ , where dried and powdered nanophosphors were mixed with KBr and pressed into a pellet for analysis using a Perkin Elmer RX1 spectrometer. The absorbance and emission/fluorescence spectra were observed by using a Shimadzu UV1601 spectrophotometer (Shimadzu, Kyoto, Japan) and a Cary Eclipse fluorescence spectrometer (Varian, Palo Alto, CA), respectively. An upconversion fluorescence spectrometer (Quanta Master, Model QM-8450-11), attached with an external NIR (980 nm) diode laser, was used to acquire the upconversion luminescence emission spectra.

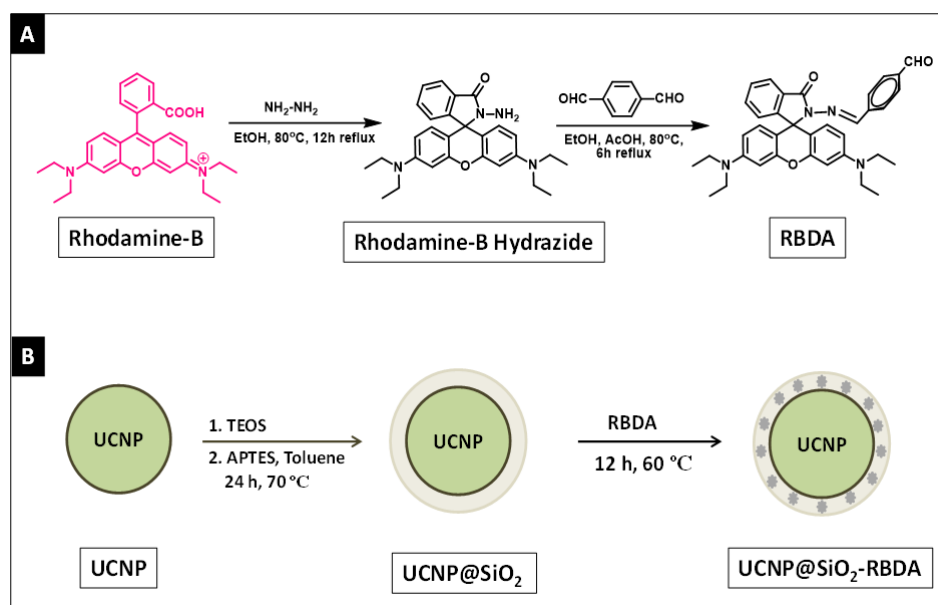

**Figure S1.** Schematic representation of (A) rhodamine-B derivative (RBDA) synthesis, and (B) UCNP@SiO<sub>2</sub>-RBDA synthesis.

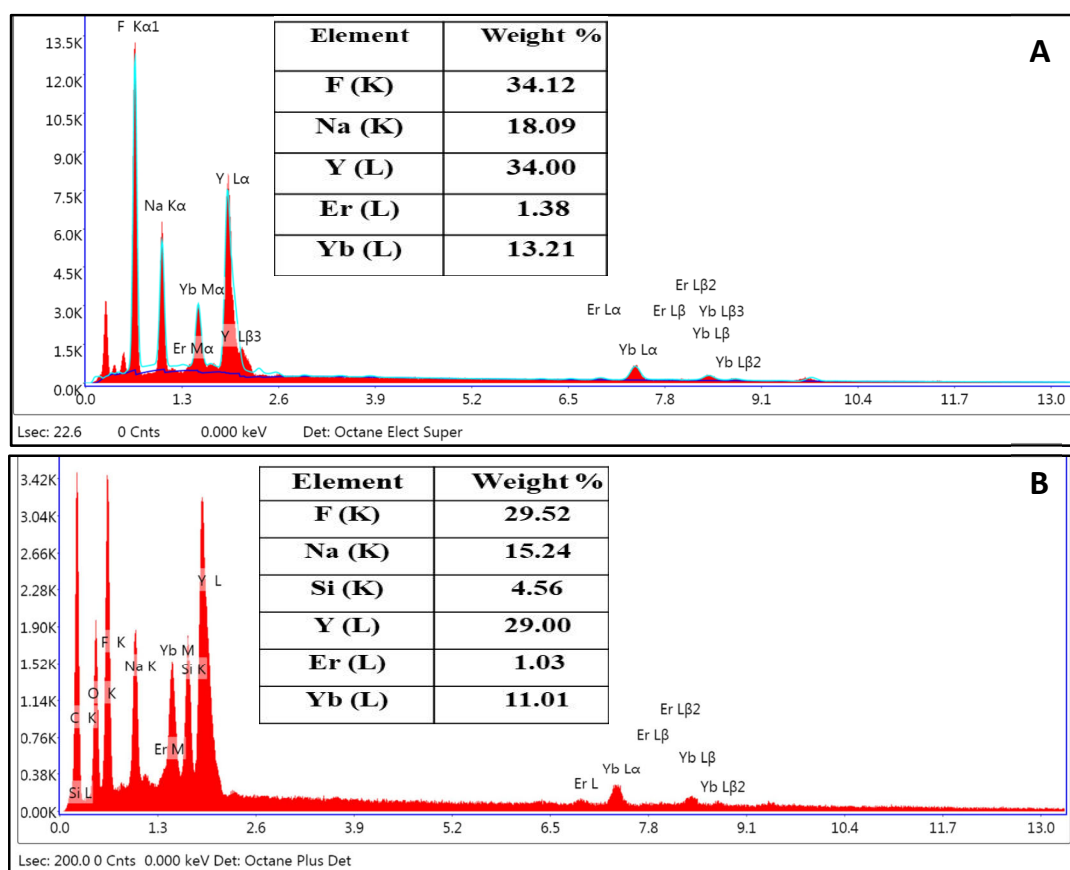

**Figure S2.** (A) EDS spectrum of as-synthesized UCNP (NaYF<sub>4</sub>: Yb<sup>3+</sup>/Er<sup>3+</sup>) (B) UCNP@SiO<sub>2</sub> (NaYF<sub>4</sub>: Yb<sup>3+</sup>/Er<sup>3+</sup>@SiO<sub>2</sub>).

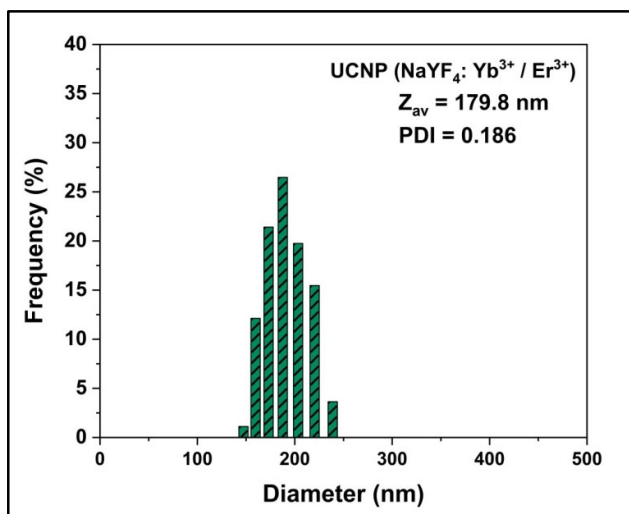

Figure S3. DLS measurement of as-synthesized UCNP (NaYF<sub>4</sub>: Yb<sup>3+</sup>/Er<sup>3+</sup>) with average size and polydispersity index.

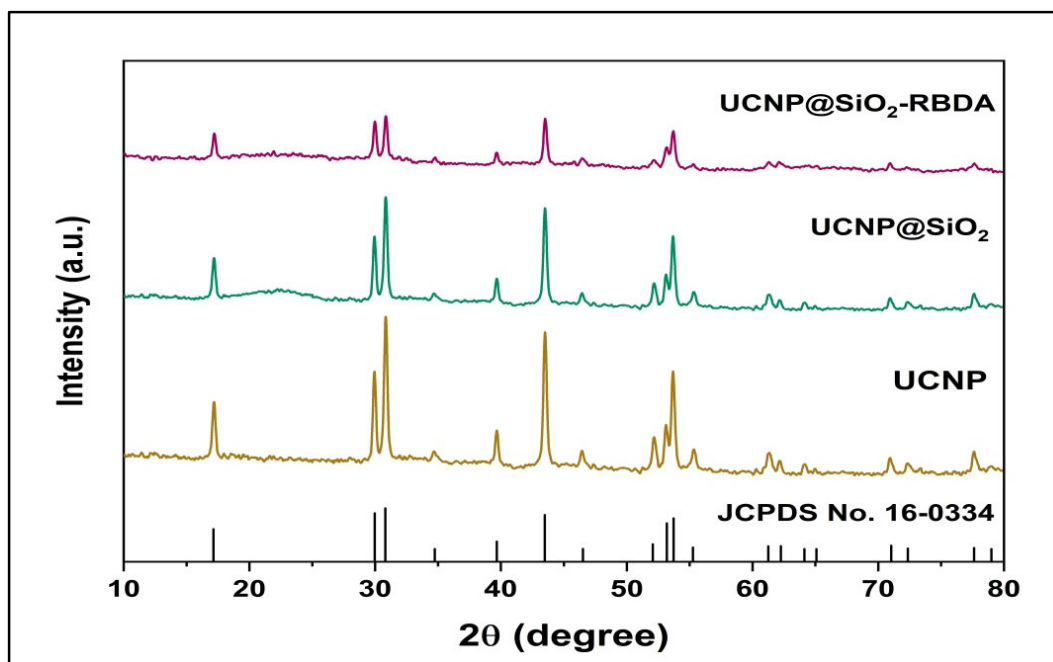

Figure S4. XRD patterns of the UCNP, UCNP@SiO<sub>2</sub>, and UCNP@SiO<sub>2</sub>-RBDA, along with standard (JCPDS No. 16-0334).

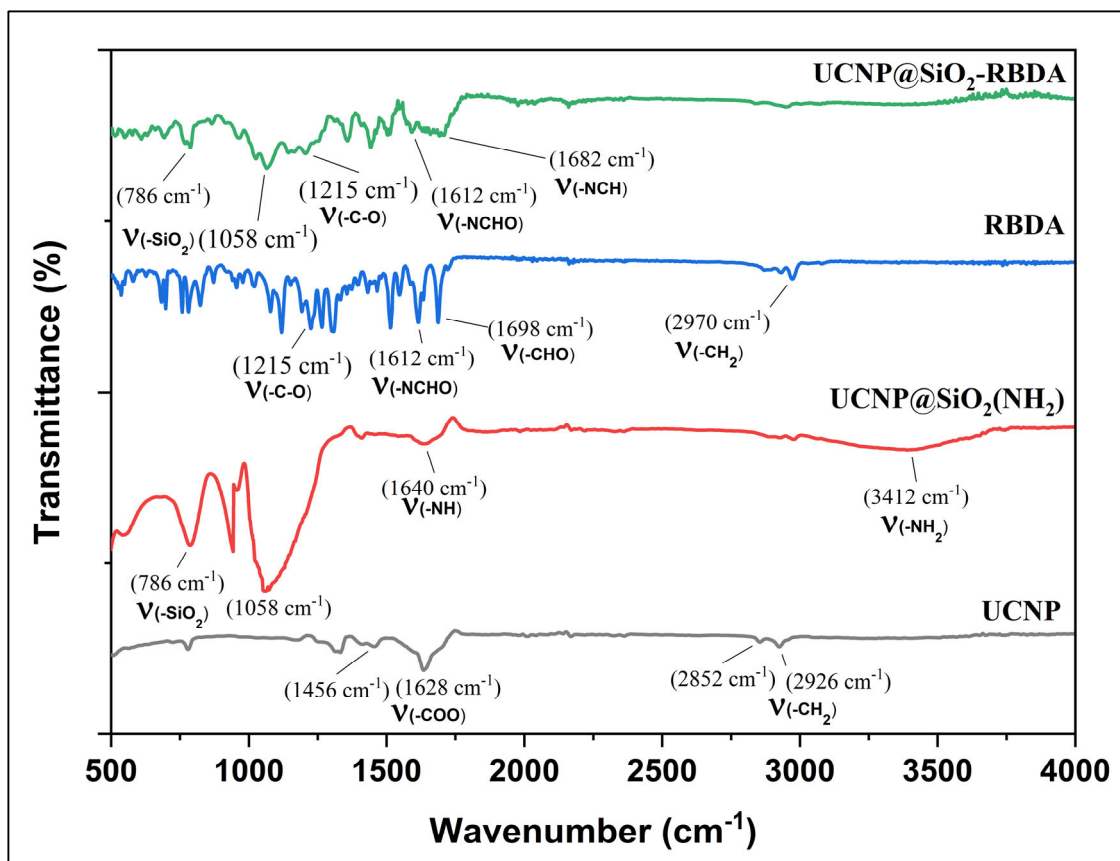

Figure S5. FT-IR of the UCNPs, UCNPs@SiO<sub>2</sub>, free RBDA, and UCNPs@SiO<sub>2</sub>-RBDA.

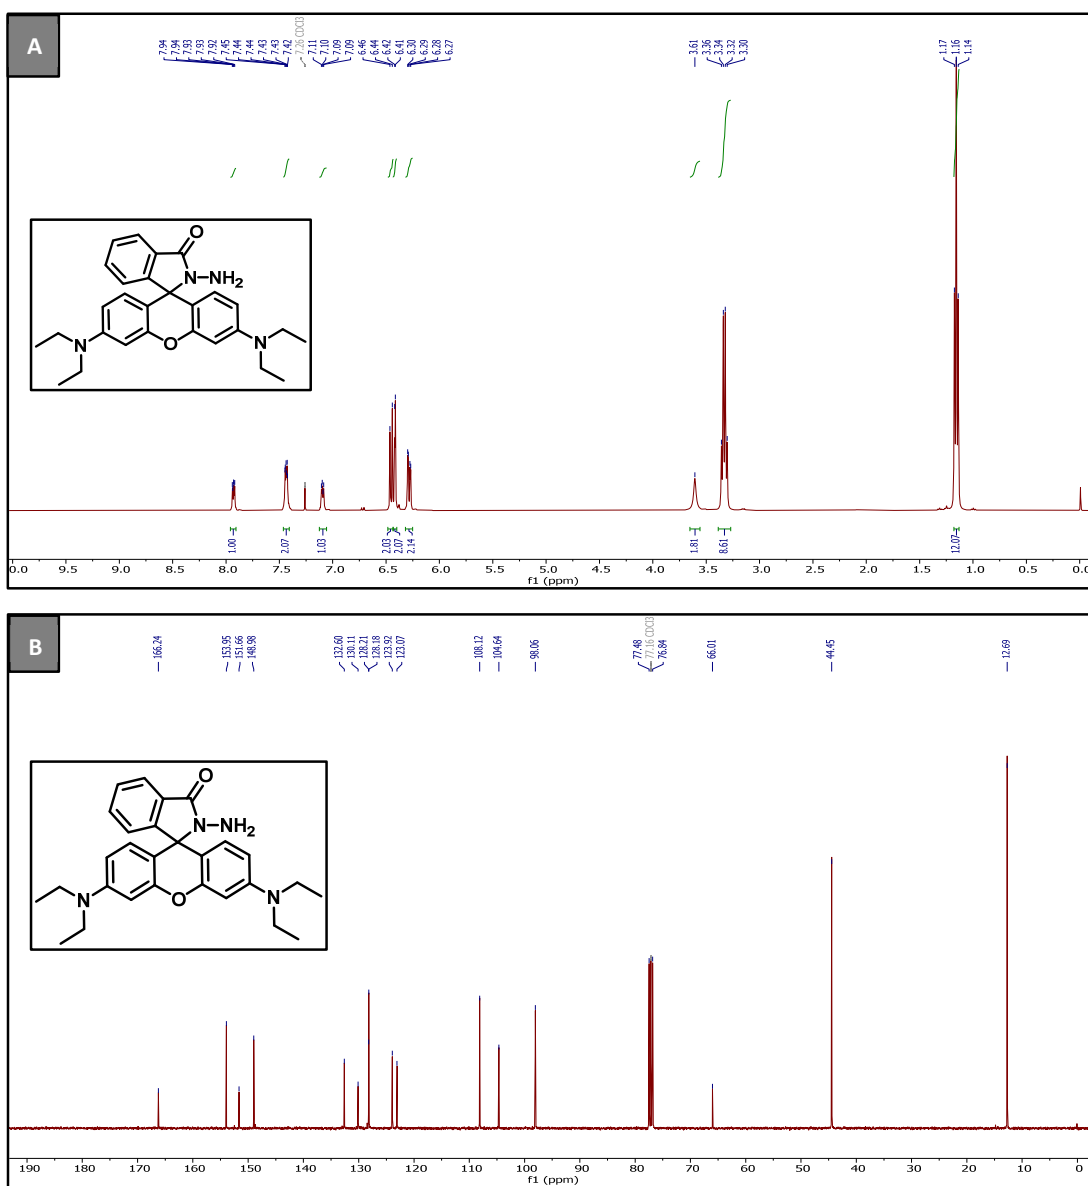

**Figure S6.** (A)  $^1\text{H}$ -NMR ( $\text{CDCl}_3$ , 400 MHz) (B)  $^{13}\text{C}$  NMR (101 MHz,  $\text{Chloroform-d}$ ) spectrum of synthesized Rhodamine B hydrazide.

**$^1\text{H}$  NMR (400 MHz,  $\text{Chloroform-d}$ ):**  $\delta$  7.96–7.89 (m, 1H), 7.44 (dt,  $J$  = 5.7, 1.5 Hz, 2H), 7.13–7.06 (m, 1H), 6.45 (d,  $J$  = 8.8 Hz, 2H), 6.42 (d,  $J$  = 2.6 Hz, 2H), 6.28 (dd,  $J$  = 8.9, 2.6 Hz, 2H), 3.33 (q,  $J$  = 7.0 Hz, 8H), 1.16 (t,  $J$  = 7.0 Hz, 12H).

**$^{13}\text{C}$  NMR (101 MHz,  $\text{CDCl}_3$ ):**  $\delta$  166.24, 153.95, 151.66, 148.98, 132.60, 130.11, 128.21, 128.18, 123.92, 123.07, 108.12, 104.64, 98.06, 77.48, 76.84, 66.01, 44.45, 12.69.

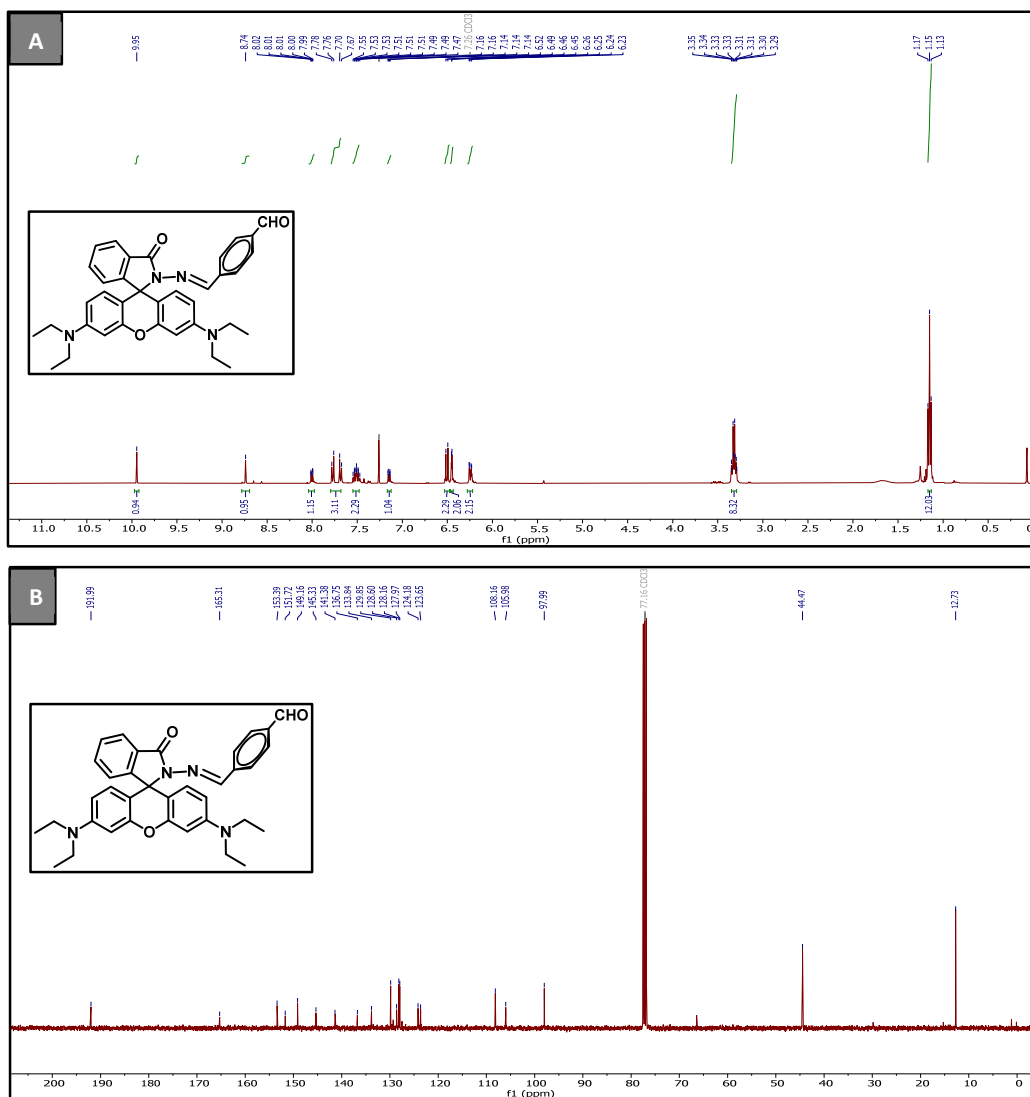

**Figure S7.** (A)  $^1\text{H}$ -NMR ( $\text{CDCl}_3$ , 400 MHz) (B)  $^{13}\text{C}$  NMR (101 MHz, Chloroform-*d*) spectrum of synthesized  $\text{Pb}^{2+}$  sensitive RBDA.

**$^1\text{H}$  NMR (400 MHz, Chloroform-*d*):**  $\delta$  9.95 (s, 1H), 8.74 (s, 1H), 8.05–7.97 (m, 1H), 7.83–7.65 (m, 3H), 7.57–7.45 (m, 2H), 7.20–7.10 (m, 1H), 6.51 (d,  $J$  = 8.9 Hz, 2H), 6.45 (d,  $J$  = 2.6 Hz, 2H), 6.24 (dd,  $J$  = 8.9, 2.6 Hz, 2H), 3.32 (q,  $J$  = 7.1 Hz, 8H), 1.15 (t,  $J$  = 7.0 Hz, 12H).

**$^{13}\text{C}$  NMR (101 MHz,  $\text{CDCl}_3$ ):**  $\delta$  191.99, 165.31, 153.39, 151.72, 149.16, 145.33, 141.38, 136.75, 133.84, 129.85, 128.60, 128.16, 127.97, 124.18, 123.65, 108.16, 105.98, 97.99, 44.47, 12.73.

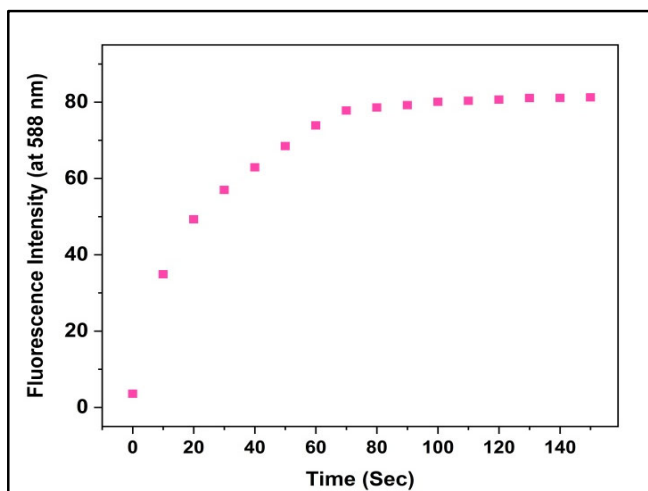

**Figure S8.** Fluorescence emission intensity of RBDA (at 588 nm) upon addition of  $\text{Pb}^{2+}$  ions ( $30 \mu\text{M}$ ) as a function of time.

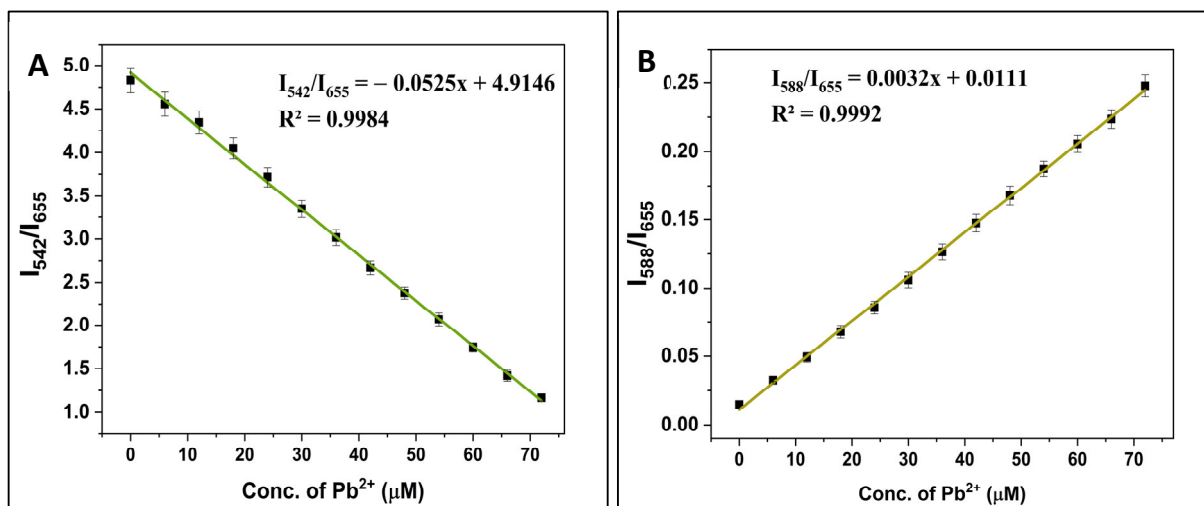

**Figure S9.** (A) The linear calibration plot with the green-to-red emission (GRE) ratios ( $I_{542}/I_{655}$ ) (B) Yellow-to-red (YRE) emission ratios ( $I_{588}/I_{655}$ ) of UCNPs@SiO<sub>2</sub>-RBDA in the presence of increasing concentration of  $\text{Pb}^{2+}$  ions.

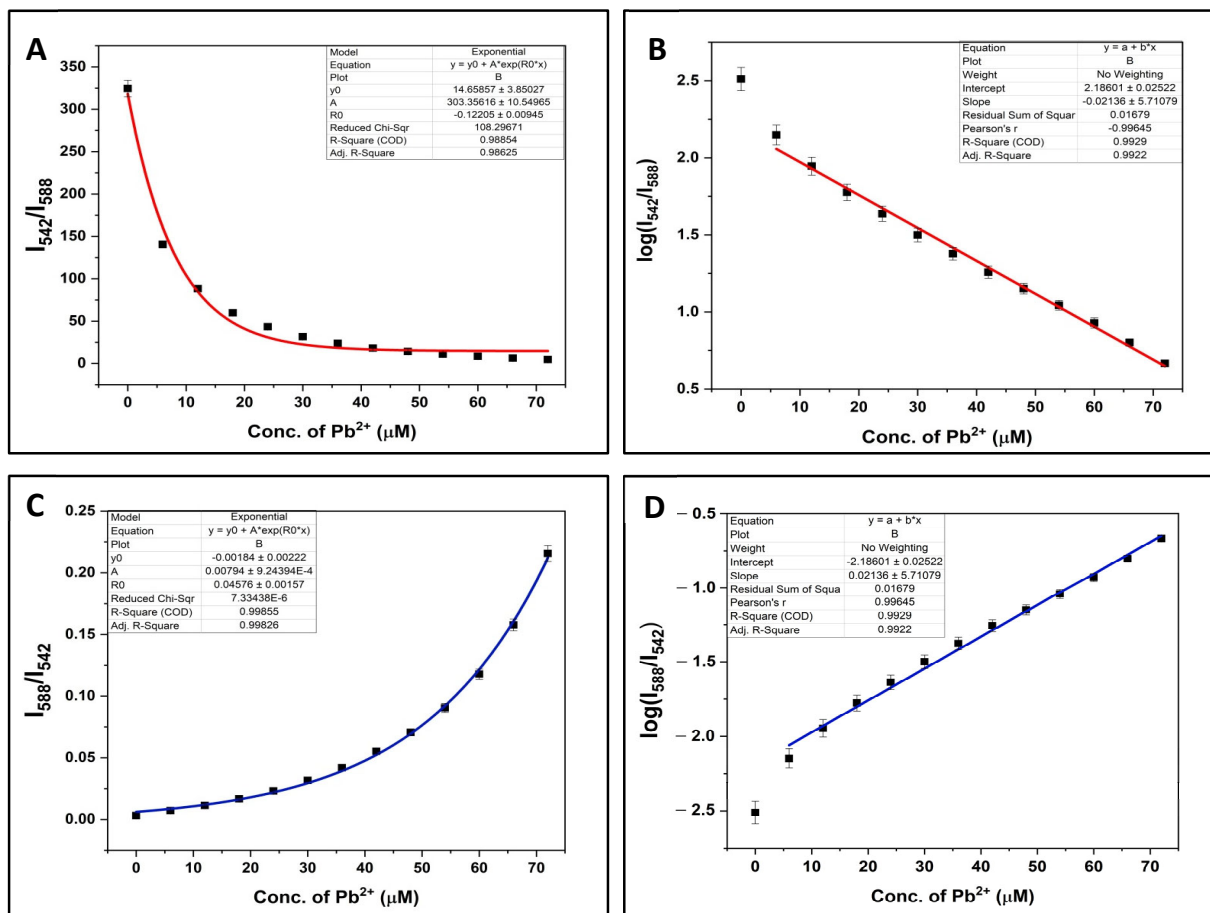

**Figure S10.** (A) The exponential and (B) logarithmic calibration curve ( $I_{542}/I_{588}$ ) with the green to RBDA emission (yellow) ratios of UCNPs@SiO<sub>2</sub>-RBDA. (C) The exponential and (D) logarithmic calibration curve with RBDA emission (yellow) ratios to green emission ratio ( $I_{588}/I_{542}$ ), in the different concentration of Pb<sup>2+</sup> ions.



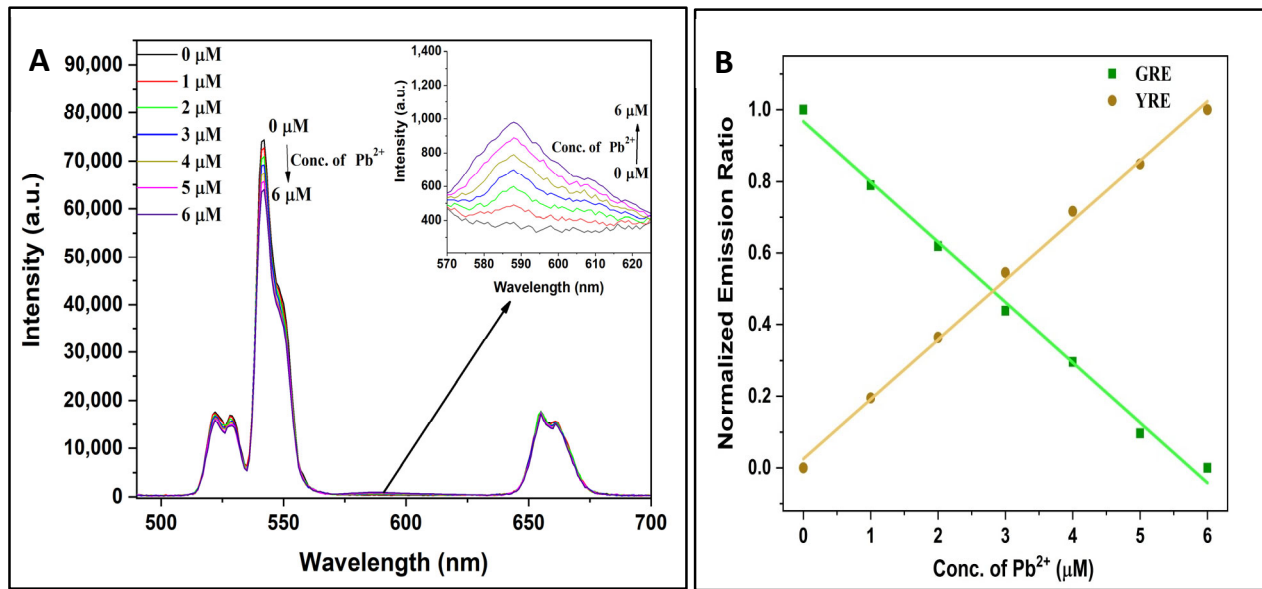

**Figure S11.** (A) Upconversion photoluminescence emission spectra of UCNP@SiO<sub>2</sub>-RBDA upon addition of Pb<sup>2+</sup> ions up to 6  $\mu M$ . (B) Variation in normalized GRE and YRE at the concentration 0-6  $\mu M$  of Pb<sup>2+</sup> ions.

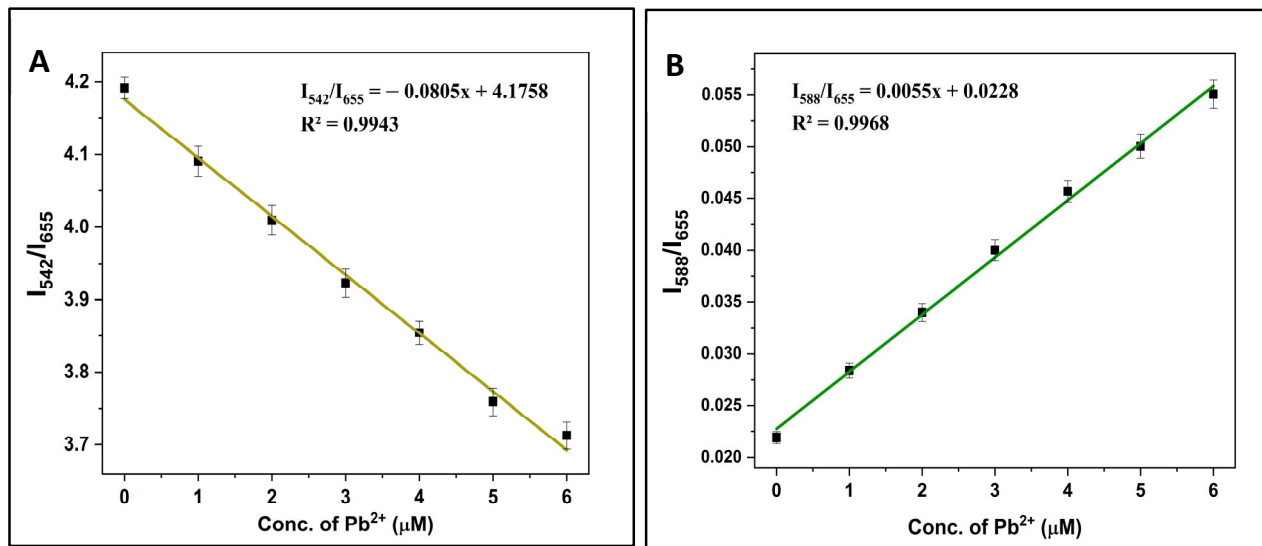

**Figure S12.** The linear calibration plot of UCNP@SiO<sub>2</sub>-RBDA in the presence of Pb<sup>2+</sup> ions in the range of 0-6  $\mu M$  (A) Green-to-red emission (GRE) ratios ( $I_{542}/I_{655}$ ) (B) Yellow-to-red (YRE) emission ratios ( $I_{588}/I_{655}$ ).

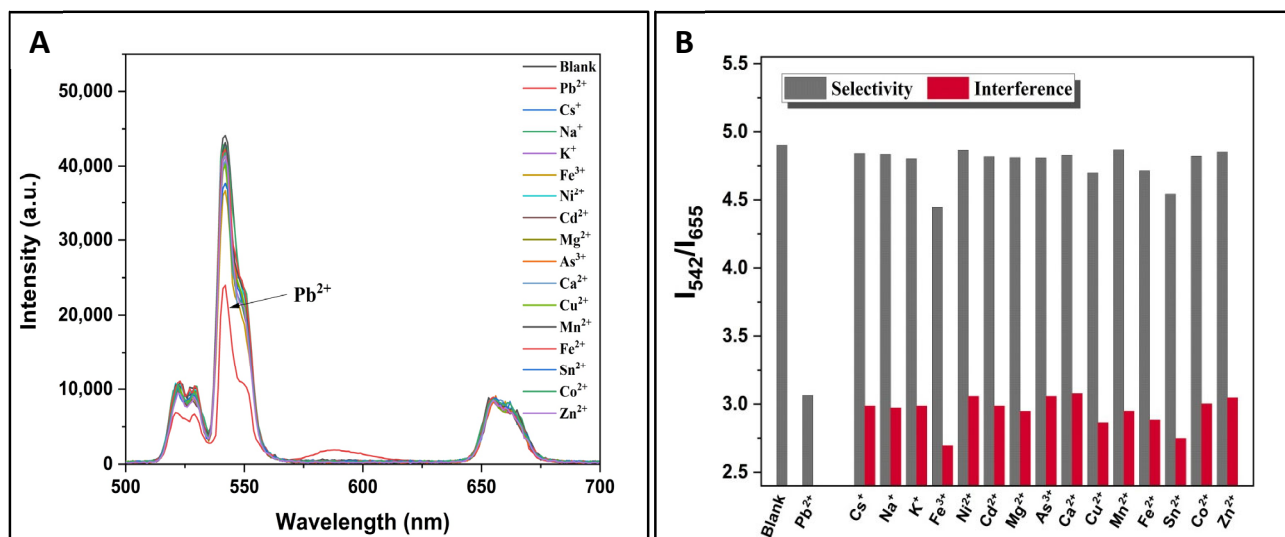

**Figure 13.** (A) Emission spectra of UCNPs@SiO<sub>2</sub>-RBDA in the presence of different metal ions, including  $Pb^{2+}$  ions. (B) Selectivity (gray bar) and interference test (red bar). The selectivity data were obtained using different metal ions, including  $Pb^{2+}$ . The interference tests were performed by the addition of 30  $\mu$ M  $Pb^{2+}$  with the coexistence of an excess of interfering ions.

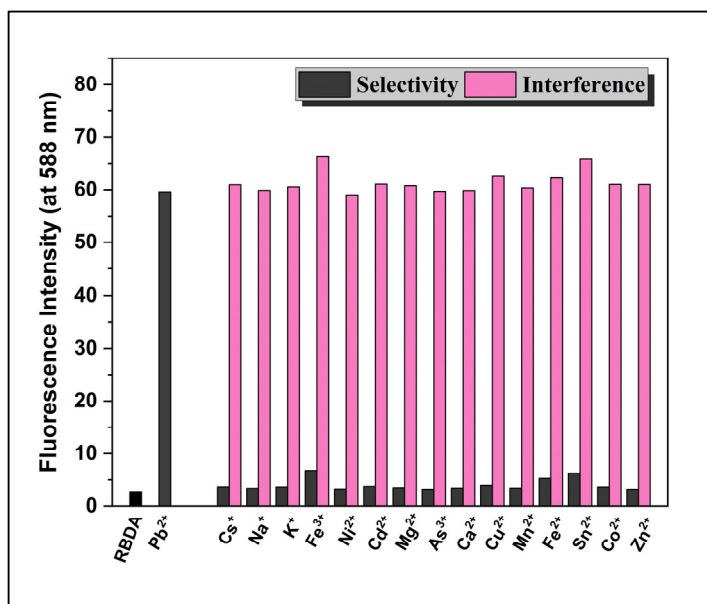

**Figure S14.** Selectivity (black bar) and interference test (pink bar) of RBDA towards different metal ions. The selectivity results were obtained using different ions, and the anti-interference tests were carried out by adding 15  $\mu$ M of  $Pb^{2+}$  ions while an excess of interfering ions was present.
